# Supplementary material for: Facile synthesis of zinc(ii)-carboxylate coordination polymer particles and their luminescent, biocompatible and antibacterial properties
Source: Royal Society of Chemistry journal article supplement (doi:10.1039/c1ce05705g), 2011-01-01
Supplement: c1ce05705g.pdf [file c1ce05705g.pdf]

## Electronic Supplementary Information (ESI)

### Facile synthesis of zinc(II)-carboxylate coordination polymer particles and their luminescent, biocompatible and antibacterial properties

Kuaibing Wang, Yuxin Yin, Chengying Li, Zhirong Geng, and Zhilin Wang\*

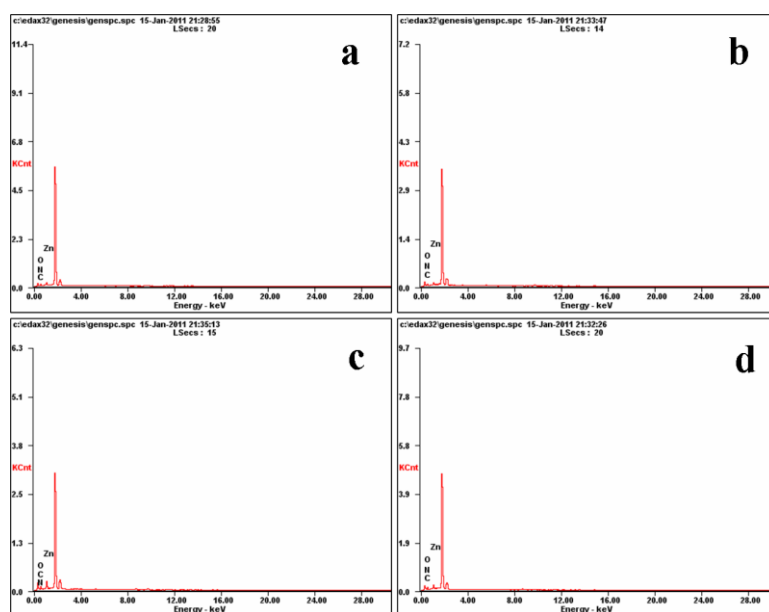

Fig. S11 EDX spectra of (a) nanobelts, (b) nanorod-flower, (c) fan-like and (d) rhombus-like particles.

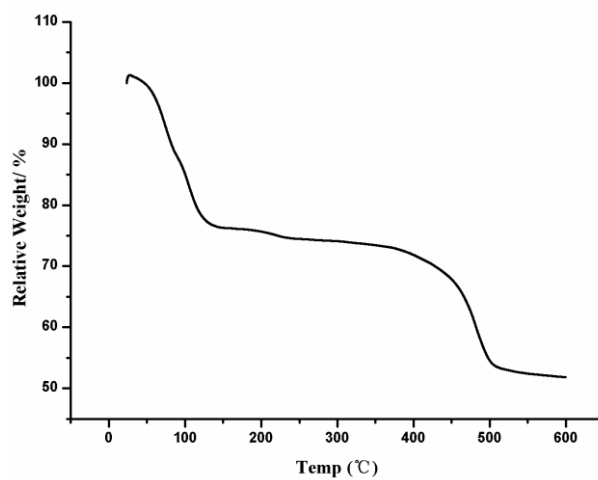

Fig. S12 TGA curve of one of the as-synthesized coordination polymer particles.

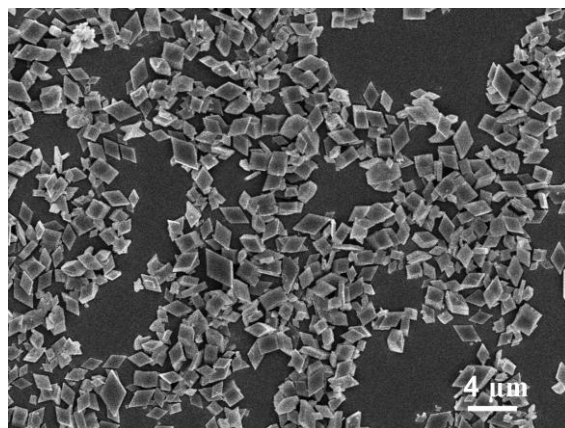

Fig. S13 SEM images of rhombus-like particles.

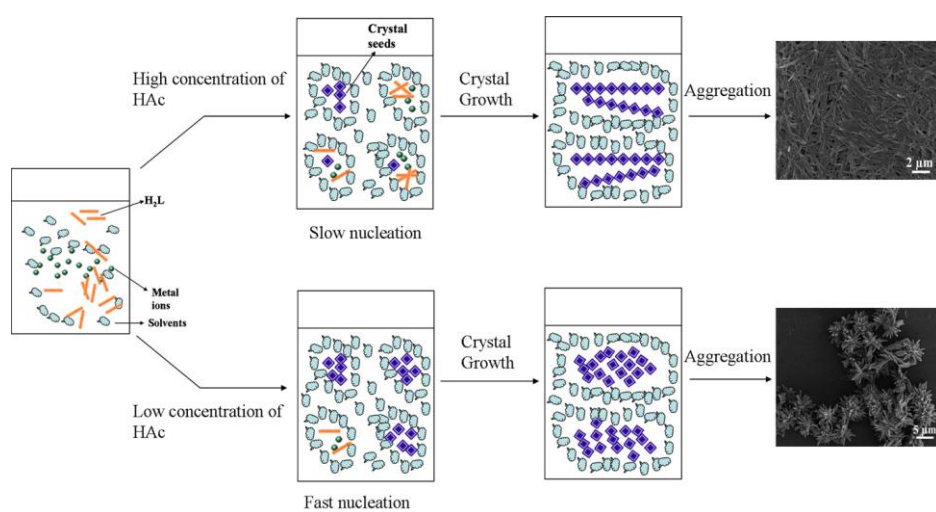

Fig. S14 The possible model for the formation and growth of nanobelts and nanorod-flower.
